# Supplementary material for: Folded discotic dimers
Source: Royal Society of Chemistry journal article supplement (doi:10.1039/c4sm01116c), 2014-06-16
Supplement: c4sm01116c1.pdf [file c4sm01116c1.pdf]

*Supporting Information*

**Folded Discotic Dimers**

Kevin J. A. Bozek and Vance E. Williams  
Department of Chemistry  
Simon Fraser University

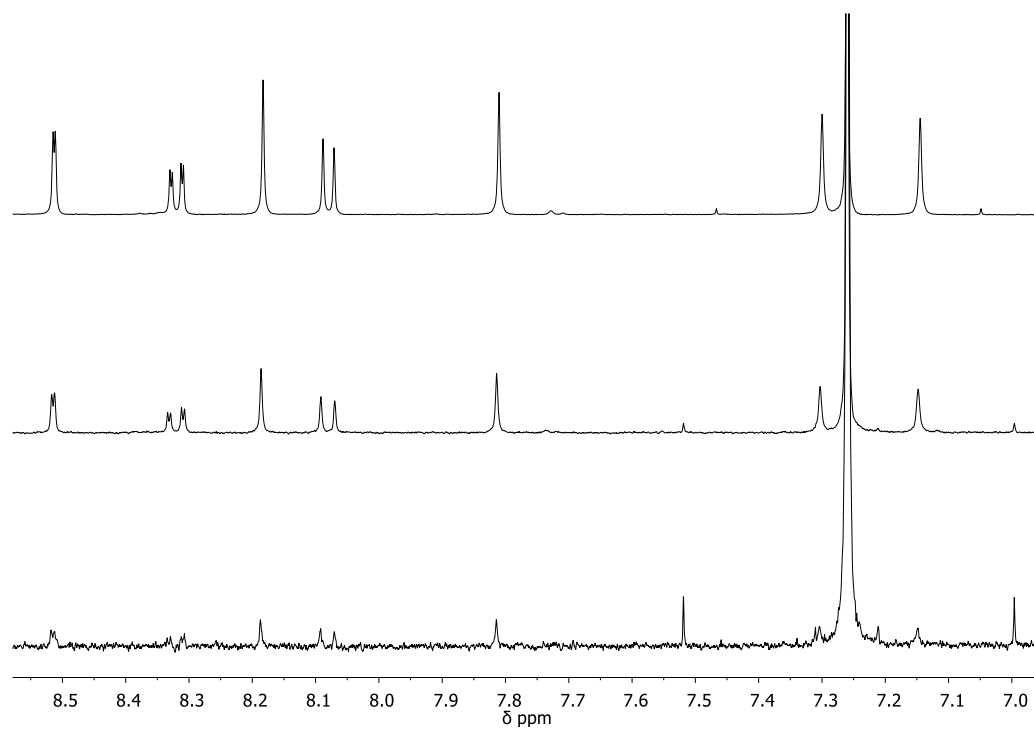

Figure S1:  $^1\text{H}$ -NMR spectra (400 MHz) in  $\text{CDCl}_3$  of **2** (a) 0.002 M (b) 0.00141 M (c) 0.000141 M

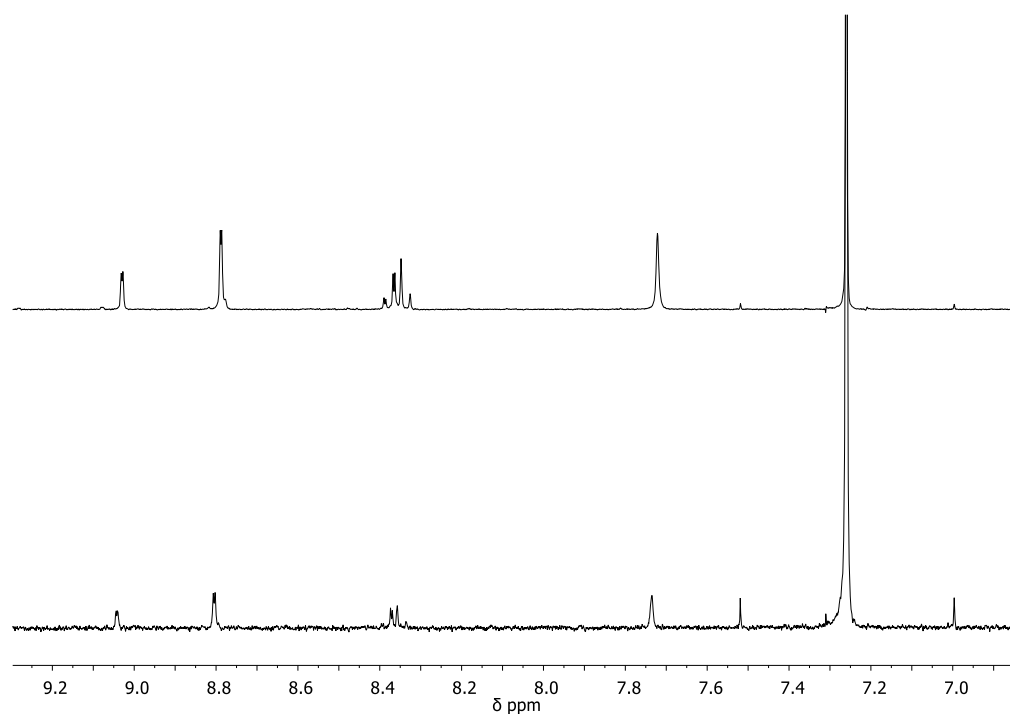

Figure S2:  $^1\text{H}$ -NMR spectra (400 MHz) in  $\text{CDCl}_3$  of **4** (a) 0.00268 M (b) 0.000268 M

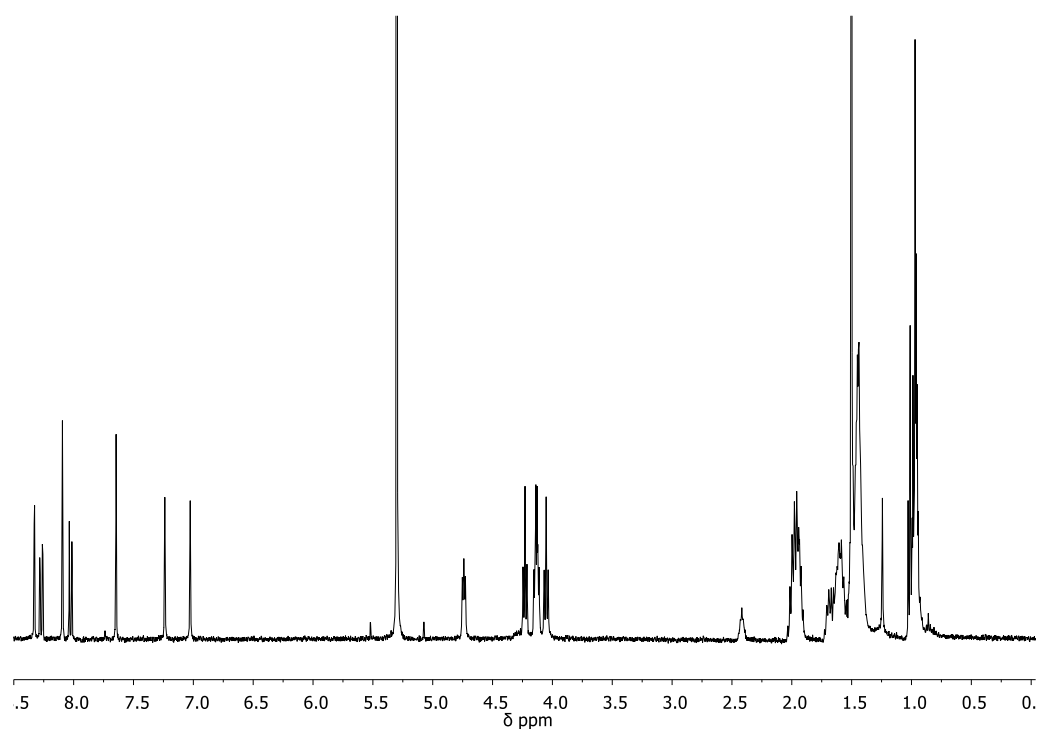

Figure S3:  $^1\text{H}$ -NMR spectra (400 MHz) in  $\text{CD}_2\text{Cl}_2$  of **2**

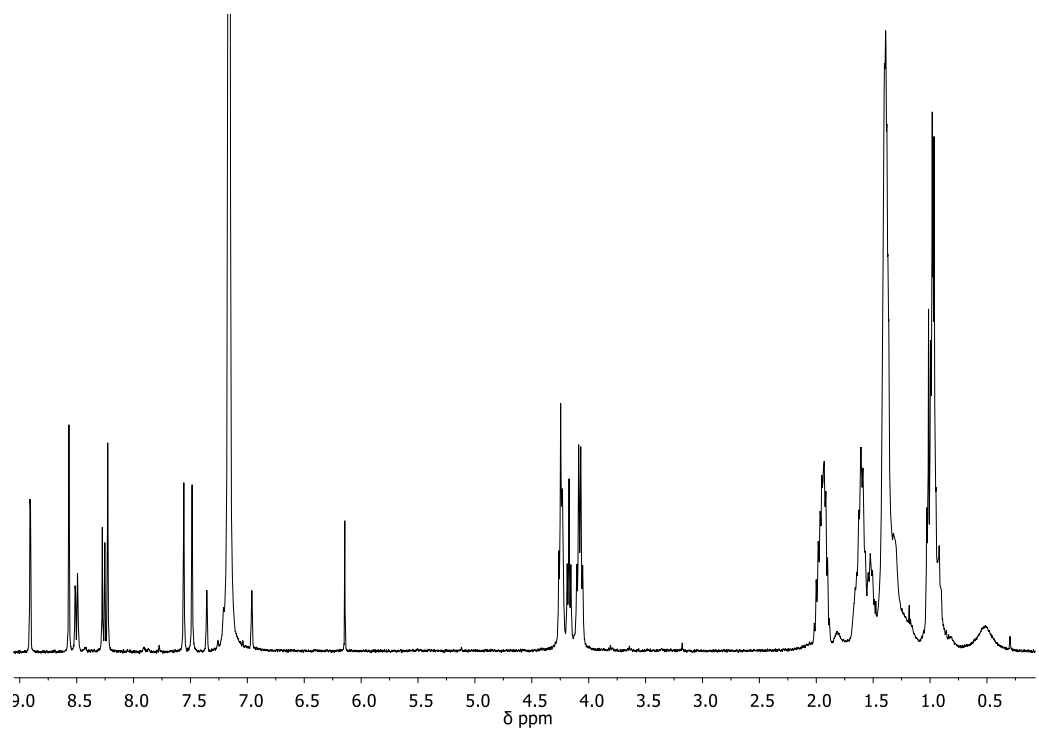

Figure S4:  $^1\text{H}$ -NMR spectra (400 MHz) in benzene- $d_6$  of **2**

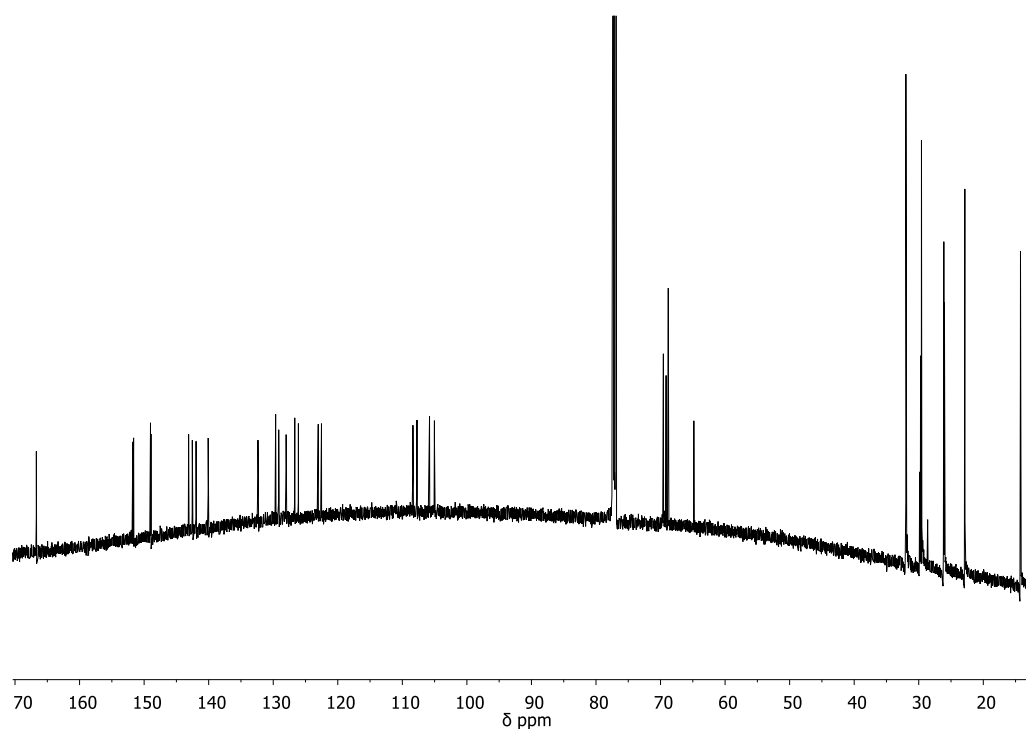

Figure S5:  $^{13}\text{C}$ -NMR spectra (150 MHz) in  $\text{CDCl}_3$  of **2**

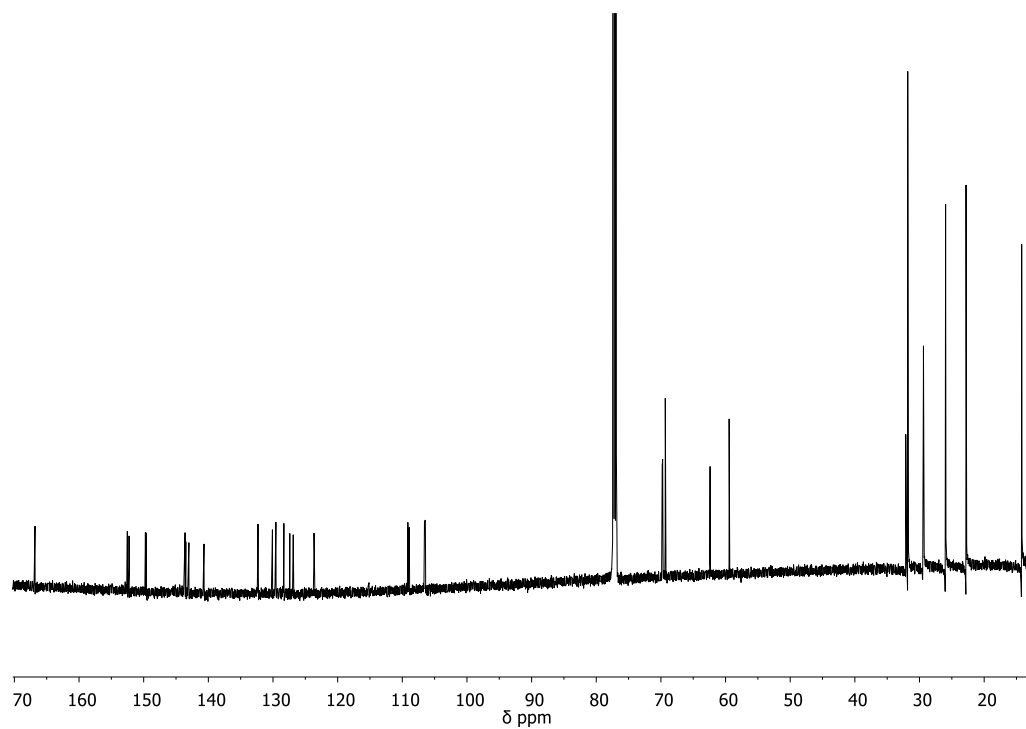

Figure S6:  $^{13}\text{C}$ -NMR spectra (150 MHz) in  $\text{CDCl}_3$  of **4**

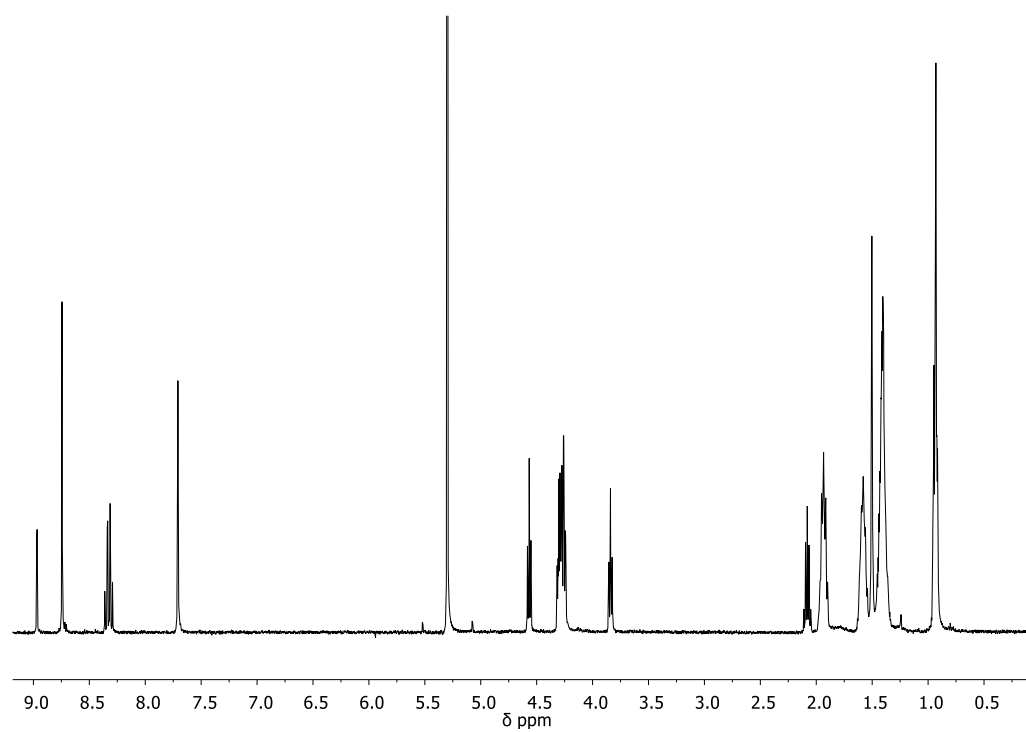

Figure S7:  $^1\text{H-NMR}$  spectra (400 MHz) in  $\text{CD}_2\text{Cl}_2$  of **4**

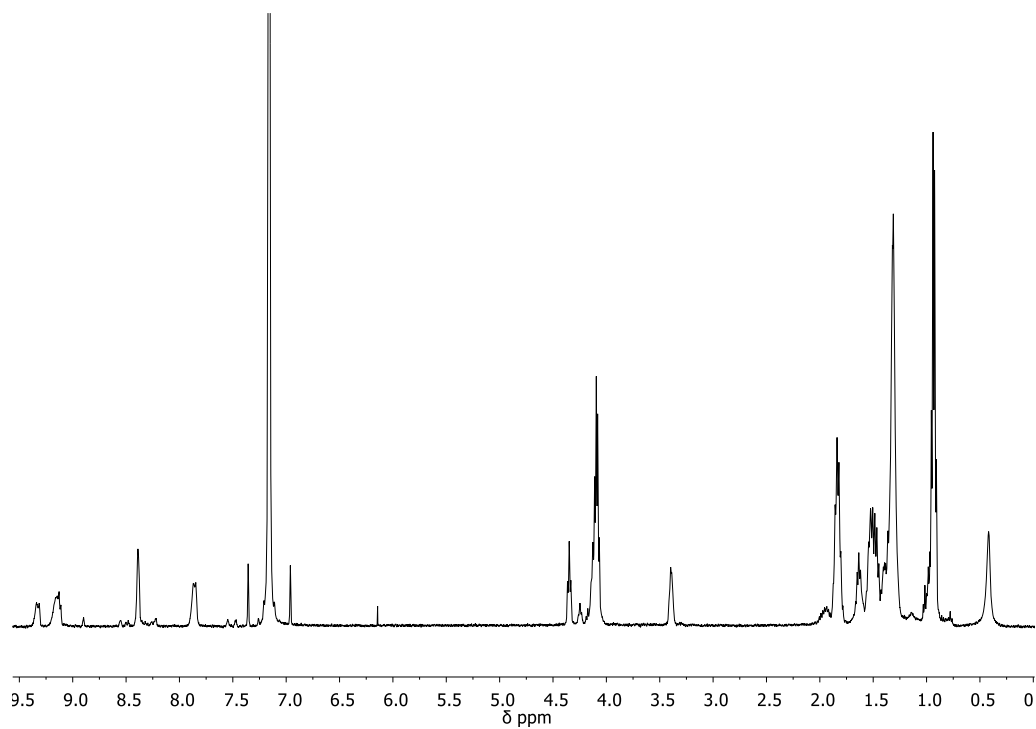

Figure S8:  $^1\text{H-NMR}$  spectra (400 MHz) in  $\text{benzene-d}_6$  of **4**

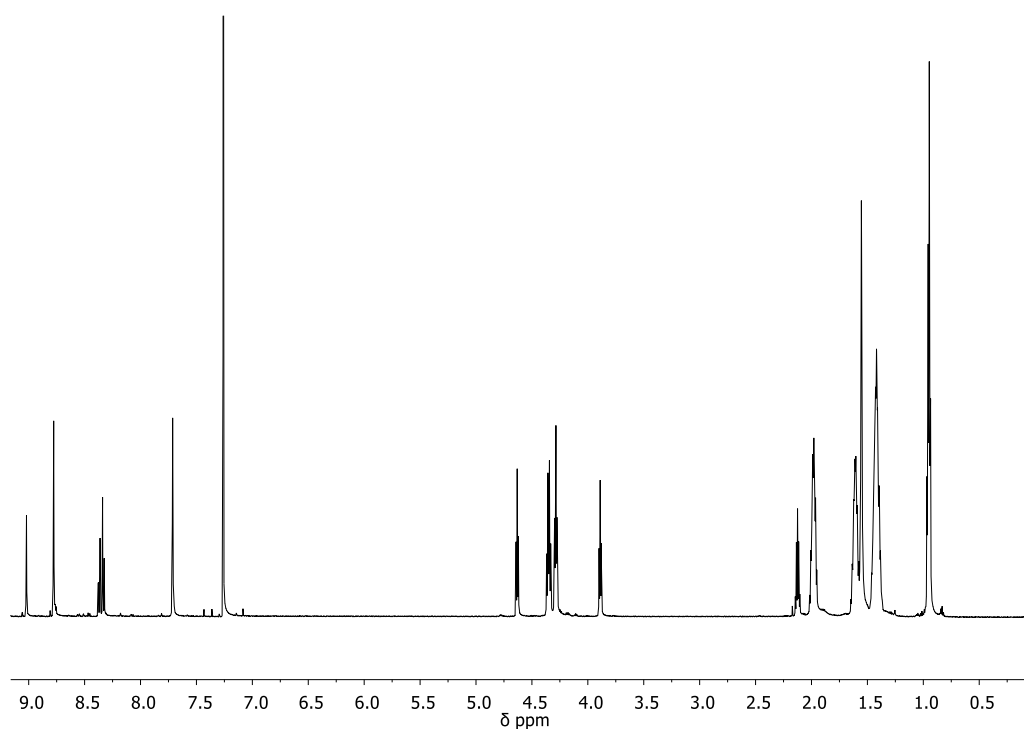

Figure S9:  $^1\text{H-NMR}$  spectra (400 MHz) in  $\text{CDCl}_3$  of **4**

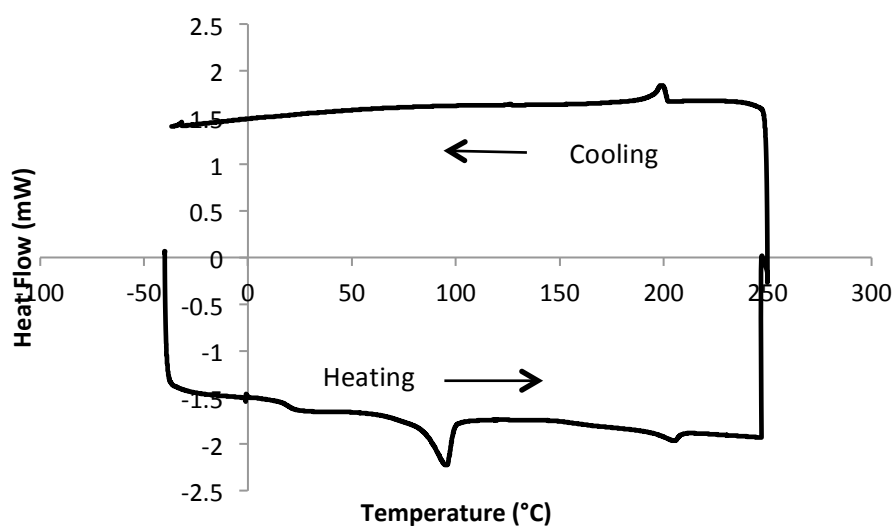

Figure S10: DSC Trace for **2** with a heating and cooling rate of  $10\text{ }^\circ\text{C min}^{-1}$

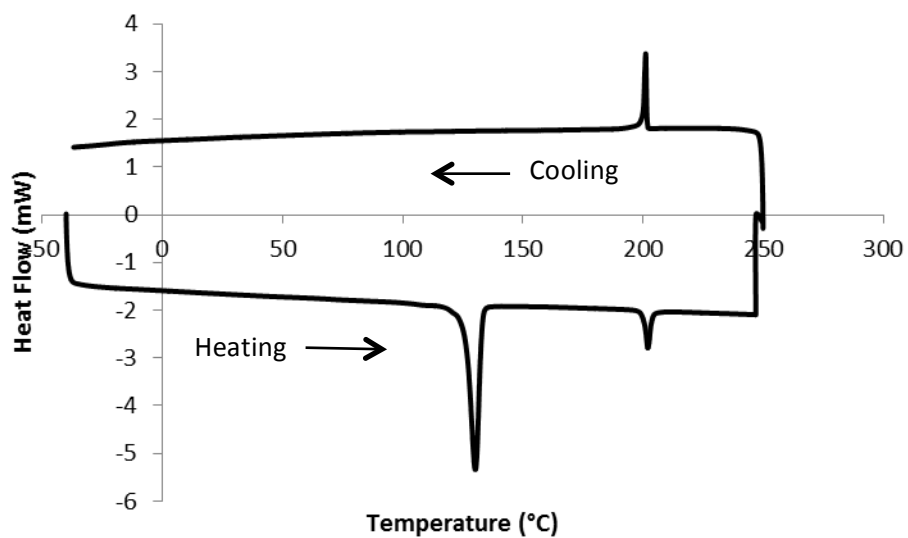

Figure S11: DSC Trace for **4** with a heating and cooling rate of  $10\text{ }^{\circ}\text{C min}^{-1}$

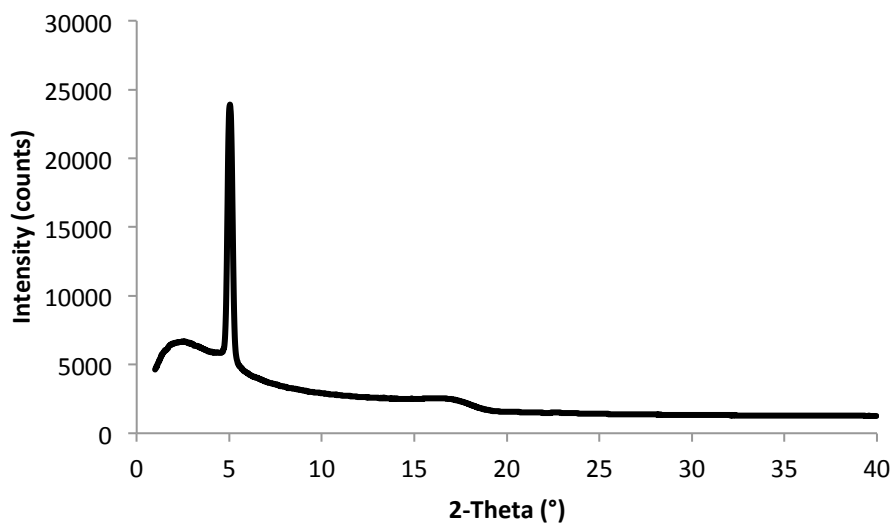

Figure S12: XRD trace of **4** at  $178\text{ }^{\circ}\text{C}$

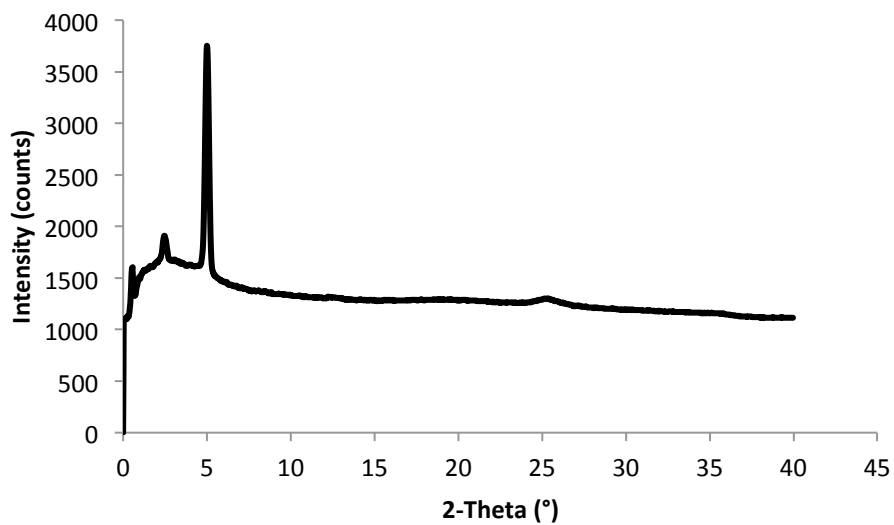

Figure S13: XRD trace of **4** at 170 °C

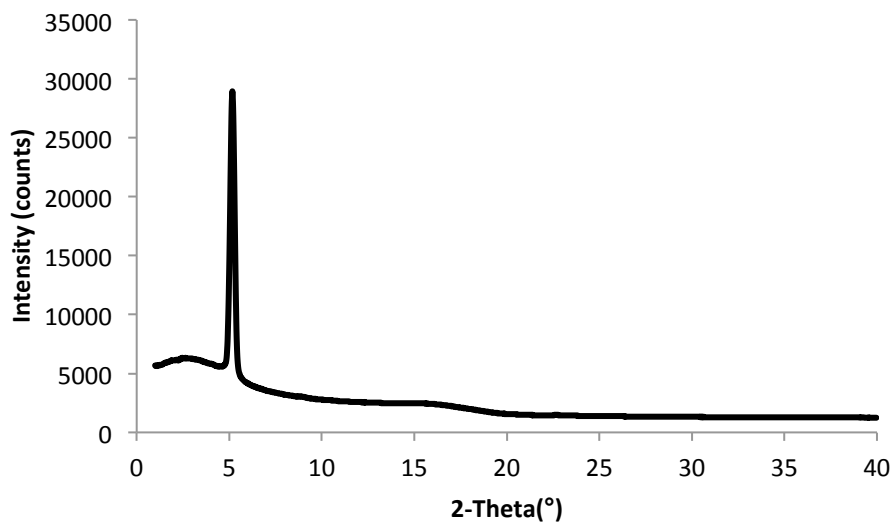

Figure S14: XRD trace of **2** at 166 °C



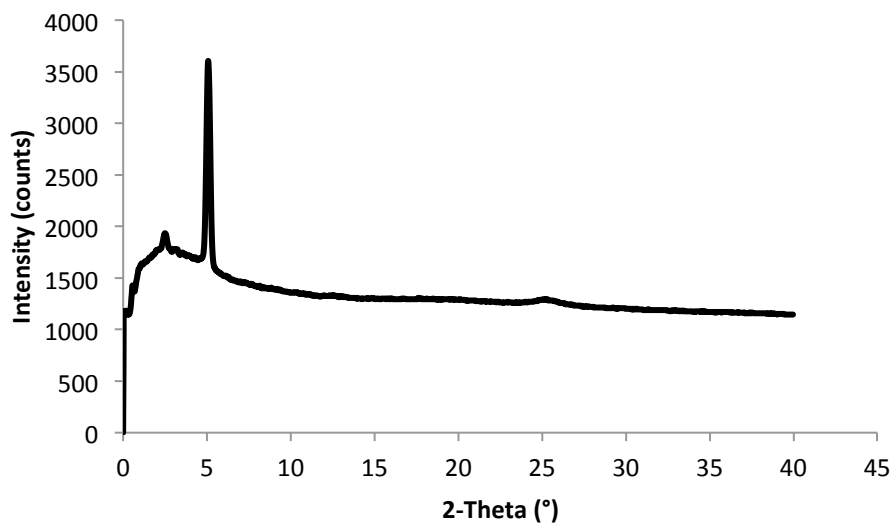

Figure S15: XRD trace of **2** at 190 °C

| Cmpd     | Phase <sup>a</sup> | T/ °C ( $\Delta H/J g^{-1}$ ) <sup>b</sup> | Phase <sup>a</sup> |                  |         |
|----------|--------------------|--------------------------------------------|--------------------|------------------|---------|
| <b>2</b> | Cr                 | 96 (27)                                    | →                  | Col <sub>h</sub> | 205 (5) |
|          |                    |                                            |                    |                  | ⇌       |
| <b>4</b> | Cr                 | 130 (72)                                   | →                  | Col <sub>h</sub> | 202 (9) |
|          |                    |                                            |                    |                  | ⇌       |

Table S1: Phase behavior of **2** and **4**. <sup>a</sup> Cr = crystal, Col<sub>h</sub> = hexagonal columnar, I = isotropic liquid. <sup>b</sup> Transition temperatures and enthalpies determined by DSC on first heating (scan rate = 10 °C min<sup>-1</sup>).

| Cmpd     | Temp (°C) | d-spacings (Å) | Miller index (hkl)     | Phase (lattice constants) |
|----------|-----------|----------------|------------------------|---------------------------|
| <b>2</b> | 166       | 17.1           | 100                    | Col <sub>h</sub>          |
|          |           | 3.55           | $\pi$ - $\pi$ stacking | (a = 19.7 Å)              |
| <b>4</b> | 178       | 17.5           | 100                    | Col <sub>h</sub>          |
|          |           | 3.55           | $\pi$ - $\pi$ stacking | (a = 20.2 Å)              |

Table S2: X-ray diffraction data of **2** and **4**
